# Supplementary material
Source: MDPI journal article supplement (https://www.mdpi.com/2073-4352/1/3/136)
Supplement: s1 [file s1]

data_1

_iucr_refine_instructions_details
;
TITL 5329 in P2(1)/n
CELL 0.71073   7.3326  19.4897   8.6586  90.000 106.069  90.000
ZERR    4.00   0.0005   0.0014   0.0006   0.000   0.002   0.000
LATT 1
SYMM 0.5-X, 0.5+Y, 0.5-Z
SFAC C  H  N
UNIT 44 52 28
OMIT  -1.00  55.00
L.S. 4
ACTA
BOND
FMAP 2
PLAN 20
SIZE 0.70 0.40 0.20
HTAB N1 N5_$2
HTAB N1 N7_$1
HTAB
HTAB N2 N6_$3
EQIV $1 -x-1/2, y+1/2, -z+1/2
EQIV $2 x+1/2, -y+1/2, z+1/2
EQIV $3 x+1/2, -y+1/2, z+1/2
TEMP 22
BOND $H
WGHT    0.064200    0.237400
FVAR       0.55340
N1    3    0.126574    0.306152    0.566785    11.00000    0.03976    0.03852 =
         0.04785   -0.01207   -0.01254    0.00777
H1A   2    0.215791    0.330128    0.635069    11.00000    0.04835
H1B   2    0.008266    0.322197    0.532001    11.00000    0.05096
N2    3    0.314400    0.209674    0.597970    11.00000    0.03294    0.03639 =
         0.03148   -0.00660   -0.00751    0.00284
N3    3    0.209575    0.114353    0.442747    11.00000    0.02849    0.03056 =
         0.03407   -0.00231   -0.00147    0.00070
N4    3    0.193873    0.047483    0.393216    11.00000    0.03190    0.03026 =
         0.03970   -0.00395    0.00375   -0.00149
N5    3   -0.071546    0.108222    0.272223    11.00000    0.03417    0.03460 =
         0.03636   -0.00386   -0.00420   -0.00085
N6    3    0.027075    0.217352    0.393401    11.00000    0.03935    0.03328 =
         0.03741   -0.00377   -0.01182    0.00533
N7    3   -0.227810   -0.127533    0.016868    11.00000    0.05330    0.05116 =
         0.06164   -0.02088    0.01692   -0.01726
C1    1    0.157197    0.243681    0.517124    11.00000    0.03343    0.03218 =
         0.03081   -0.00001   -0.00159    0.00212
C2    1    0.383725    0.147814    0.537472    11.00000    0.02662    0.03381 =
         0.03138   -0.00339   -0.00054   -0.00091
C3    1    0.052394    0.149822    0.368704    11.00000    0.03085    0.03479 =
         0.03002    0.00058   -0.00374    0.00185
C4    1    0.021686    0.047203    0.291764    11.00000    0.03053    0.03334 =
         0.03337   -0.00181    0.00584   -0.00322
C5    1   -0.062916   -0.013804    0.200621    11.00000    0.03000    0.03740 =
         0.03935   -0.00529    0.01126   -0.00621
C6    1    0.000460   -0.079583    0.246043    11.00000    0.03304    0.03980 =
         0.05787   -0.00540    0.00891   -0.00160
AFIX  43
H6    2    0.098776   -0.087030    0.338761    11.00000   -1.20000
AFIX   0
C7    1   -0.084905   -0.133960    0.151225    11.00000    0.04730    0.03812 =
         0.08055   -0.01131    0.01984   -0.00369
AFIX  43
H7    2   -0.040294   -0.177889    0.182683    11.00000   -1.20000
AFIX   0
C8    1   -0.286326   -0.063984   -0.024487    11.00000    0.05081    0.05539 =
         0.04068   -0.01015    0.00931   -0.01736
AFIX  43
H8    2   -0.385086   -0.058009   -0.117612    11.00000   -1.20000
AFIX   0
C9    1   -0.210633   -0.006387    0.061208    11.00000    0.04344    0.04395 =
         0.03739   -0.00225    0.00689   -0.00907
AFIX  43
H9    2   -0.257709    0.036910    0.026284    11.00000   -1.20000
AFIX   0
C10   1    0.485660    0.102282    0.676399    11.00000    0.03155    0.04634 =
         0.03781    0.00170   -0.00159    0.00740
AFIX 137
H10A  2    0.591712    0.126650    0.744110    11.00000   -1.50000
H10B  2    0.530013    0.061660    0.635520    11.00000   -1.50000
H10C  2    0.399844    0.089686    0.737598    11.00000   -1.50000
AFIX   0
C11   1    0.508637    0.165366    0.429132    11.00000    0.04531    0.05521 =
         0.04688   -0.00265    0.01395   -0.00966
AFIX 137
H11A  2    0.436255    0.191022    0.338082    11.00000   -1.50000
H11B  2    0.553834    0.123818    0.392891    11.00000   -1.50000
H11C  2    0.614692    0.192341    0.488014    11.00000   -1.50000
AFIX   0
H2    2    0.382814    0.227959    0.682180    11.00000    0.04139
 
HKLF 4
 
REM  5329 in P2(1)/n
REM R1 =  0.0476 for   2282 Fo > 4sig(Fo)  and  0.0582 for all   2736 data
REM    177 parameters refined using      0 restraints
 
END  
     
WGHT      0.0642      0.2374 
REM Highest difference peak  0.268,  deepest hole -0.213,  1-sigma level  0.042
Q1    1   0.4423  0.1546  0.4818  11.00000  0.05    0.27
Q2    1  -0.0121  0.0190  0.2428  11.00000  0.05    0.24
Q3    1   0.3013  0.1284  0.4948  11.00000  0.05    0.23
Q4    1   0.1713  0.2882  0.5056  11.00000  0.05    0.20
Q5    1   0.4379  0.1262  0.5982  11.00000  0.05    0.20
Q6    1   0.0132 -0.0457  0.1852  11.00000  0.05    0.20
Q7    1   0.0049  0.0806  0.2362  11.00000  0.05    0.18
Q8    1   0.3588  0.1833  0.5584  11.00000  0.05    0.18
Q9    1  -0.0636 -0.0454  0.2354  11.00000  0.05    0.17
Q10   1   0.1129  0.2664  0.5881  11.00000  0.05    0.17
Q11   1  -0.0046  0.1827  0.4070  11.00000  0.05    0.17
Q12   1   0.3057  0.1685  0.6036  11.00000  0.05    0.17
Q13   1   0.0037  0.1374  0.2862  11.00000  0.05    0.16
Q14   1   0.1192  0.1240  0.4806  11.00000  0.05    0.16
Q15   1   0.1509  0.1374  0.3723  11.00000  0.05    0.16
Q16   1  -0.1599 -0.0109  0.1514  11.00000  0.05    0.16
Q17   1  -0.0569  0.2423  0.3521  11.00000  0.05    0.15
Q18   1  -0.1990 -0.0348 -0.0038  11.00000  0.05    0.15
Q19   1  -0.0483  0.0701  0.3123  11.00000  0.05    0.15
Q20   1   0.2295  0.1815  0.6613  11.00000  0.05    0.15

;

_audit_update_record
;
2011-05-11 # Formatted by publCIF
;
_publ_contact_author_name        'Anton V. Dolzhenko'
_publ_contact_author_email       phada@nus.edu.sg
loop_
_publ_author_name
_publ_author_address
' Dolzhenko, Anton V.' ''

_audit_creation_method           SHELXL-97
_chemical_name_systematic        
;\
7,7-dimethyl-2-pyridin-4-yl-6,7-dihydro[1,2,4]triazolo[1,5-a][1,3,5]triazin-5-\
amine
;
_chemical_name_common            ?
_chemical_melting_point          ?
_chemical_formula_moiety         ?
_chemical_formula_sum            'C11 H13 N7'
_chemical_formula_weight         243.28

loop_
_atom_type_symbol
_atom_type_description
_atom_type_scat_dispersion_real
_atom_type_scat_dispersion_imag
_atom_type_scat_source
C C 0.0033 0.0016 'International Tables Vol C Tables 4.2.6.8 and 6.1.1.4'
H H 0.0000 0.0000 'International Tables Vol C Tables 4.2.6.8 and 6.1.1.4'
N N 0.0061 0.0033 'International Tables Vol C Tables 4.2.6.8 and 6.1.1.4'

_symmetry_cell_setting           monoclinic
_symmetry_space_group_name_H-M   'P 21/n'
_symmetry_int_tables_number      14

loop_
_symmetry_equiv_pos_as_xyz
'x, y, z'
'-x+1/2, y+1/2, -z+1/2'
'-x, -y, -z'
'x-1/2, -y-1/2, z-1/2'

_cell_length_a                   7.3326(5)
_cell_length_b                   19.4897(14)
_cell_length_c                   8.6586(6)
_cell_angle_alpha                90.00
_cell_angle_beta                 106.069(2)
_cell_angle_gamma                90.00
_cell_volume                     1189.06(14)
_cell_formula_units_Z            4
_cell_measurement_temperature    295(2)
_cell_measurement_reflns_used    2409
_cell_measurement_theta_min      2.66
_cell_measurement_theta_max      26.03

_exptl_crystal_description       BLOCK
_exptl_crystal_colour            COLOURLESS
_exptl_crystal_size_max          0.70
_exptl_crystal_size_mid          0.40
_exptl_crystal_size_min          0.20
_exptl_crystal_density_meas      ?
_exptl_crystal_density_diffrn    1.359
_exptl_crystal_density_method    'not measured'
_exptl_crystal_F_000             512
_exptl_absorpt_coefficient_mu    0.091
_exptl_absorpt_correction_type   multi-scan
_exptl_absorpt_correction_T_min  0.9388
_exptl_absorpt_correction_T_max  0.9819
_exptl_absorpt_process_details   ?

_exptl_special_details           
?

_diffrn_ambient_temperature      295(2)
_diffrn_radiation_probe          x-ray
_diffrn_radiation_type           MoK\a
_diffrn_radiation_wavelength     0.71073
_diffrn_source                   'fine-focus sealed tube'
_diffrn_radiation_monochromator  graphite
_diffrn_measurement_device_type  'CCD area detector'
_diffrn_measurement_method       'phi and omega scans'
_diffrn_detector_area_resol_mean ?
_diffrn_standards_number         ?
_diffrn_standards_interval_count ?
_diffrn_standards_interval_time  ?
_diffrn_standards_decay_%        ?
_diffrn_reflns_number            8323
_diffrn_reflns_av_R_equivalents  0.0235
_diffrn_reflns_av_sigmaI/netI    0.0254
_diffrn_reflns_limit_h_min       -9
_diffrn_reflns_limit_h_max       5
_diffrn_reflns_limit_k_min       -25
_diffrn_reflns_limit_k_max       25
_diffrn_reflns_limit_l_min       -11
_diffrn_reflns_limit_l_max       11
_diffrn_reflns_theta_min         2.09
_diffrn_reflns_theta_max         27.50
_reflns_number_total             2736
_reflns_number_gt                2282
_reflns_threshold_expression     >2sigma(I)

_computing_data_collection       'Bruker SMART'
_computing_cell_refinement       'Bruker SMART'
_computing_data_reduction        'Bruker SAINT'
_computing_structure_solution    'SHELXS-97'
_computing_structure_refinement  'SHELXL-97'
_computing_molecular_graphics    'Bruker SHELXTL'
_computing_publication_material  'Bruker SHELXTL'

_refine_special_details          
; 
 Refinement of F^2^ against ALL reflections.  The weighted R-factor wR and 
 goodness of fit S are based on F^2^, conventional R-factors R are based 
 on F, with F set to zero for negative F^2^. The threshold expression of 
 F^2^ > 2sigma(F^2^) is used only for calculating R-factors(gt) etc. and is 
 not relevant to the choice of reflections for refinement.  R-factors based 
 on F^2^ are statistically about twice as large as those based on F, and R- 
 factors based on ALL data will be even larger. 
;

_refine_ls_structure_factor_coef Fsqd
_refine_ls_matrix_type           full
_refine_ls_weighting_scheme      calc
_refine_ls_weighting_details     
'calc w=1/[\s^2^(Fo^2^)+(0.0642P)^2^+0.2374P] where P=(Fo^2^+2Fc^2^)/3'
_atom_sites_solution_primary     direct
_atom_sites_solution_secondary   difmap
_atom_sites_solution_hydrogens   geom
_refine_ls_hydrogen_treatment    mixed
_refine_ls_extinction_method     none
_refine_ls_extinction_coef       ?
_refine_ls_number_reflns         2736
_refine_ls_number_parameters     177
_refine_ls_number_restraints     0
_refine_ls_R_factor_all          0.0582
_refine_ls_R_factor_gt           0.0476
_refine_ls_wR_factor_ref         0.1255
_refine_ls_wR_factor_gt          0.1188
_refine_ls_goodness_of_fit_ref   1.057
_refine_ls_restrained_S_all      1.057
_refine_ls_shift/su_max          0.000
_refine_ls_shift/su_mean         0.000

loop_
_atom_site_label
_atom_site_type_symbol
_atom_site_fract_x
_atom_site_fract_y
_atom_site_fract_z
_atom_site_U_iso_or_equiv
_atom_site_adp_type
_atom_site_occupancy
_atom_site_symmetry_multiplicity
_atom_site_calc_flag
_atom_site_refinement_flags
_atom_site_disorder_assembly
_atom_site_disorder_group
N1 N 0.1266(2) 0.30615(7) 0.56678(17) 0.0470(4) Uani 1 1 d . . .
H1A H 0.216(3) 0.3301(9) 0.635(2) 0.048(5) Uiso 1 1 d . . .
H1B H 0.008(3) 0.3222(9) 0.532(2) 0.051(5) Uiso 1 1 d . . .
N2 N 0.31440(17) 0.20967(6) 0.59797(15) 0.0369(3) Uani 1 1 d . . .
N3 N 0.20958(16) 0.11435(6) 0.44275(14) 0.0331(3) Uani 1 1 d . . .
N4 N 0.19387(17) 0.04748(6) 0.39322(15) 0.0352(3) Uani 1 1 d . . .
N5 N -0.07155(17) 0.10822(6) 0.27222(15) 0.0378(3) Uani 1 1 d . . .
N6 N 0.02707(18) 0.21735(6) 0.39340(15) 0.0412(3) Uani 1 1 d . . .
N7 N -0.2278(2) -0.12753(8) 0.01687(19) 0.0552(4) Uani 1 1 d . . .
C1 C 0.1572(2) 0.24368(7) 0.51712(16) 0.0342(3) Uani 1 1 d . . .
C2 C 0.38373(19) 0.14781(7) 0.53747(16) 0.0323(3) Uani 1 1 d . . .
C3 C 0.0524(2) 0.14982(7) 0.36870(16) 0.0343(3) Uani 1 1 d . . .
C4 C 0.0217(2) 0.04720(7) 0.29176(16) 0.0330(3) Uani 1 1 d . . .
C5 C -0.0629(2) -0.01380(7) 0.20062(18) 0.0352(3) Uani 1 1 d . . .
C6 C 0.0005(2) -0.07958(8) 0.2460(2) 0.0443(4) Uani 1 1 d . . .
H6 H 0.0988 -0.0870 0.3388 0.053 Uiso 1 1 calc R . .
C7 C -0.0849(3) -0.13396(9) 0.1512(3) 0.0549(5) Uani 1 1 d . . .
H7 H -0.0403 -0.1779 0.1827 0.066 Uiso 1 1 calc R . .
C8 C -0.2863(3) -0.06398(9) -0.0245(2) 0.0496(4) Uani 1 1 d . . .
H8 H -0.3851 -0.0580 -0.1176 0.060 Uiso 1 1 calc R . .
C9 C -0.2106(2) -0.00639(9) 0.06121(18) 0.0425(4) Uani 1 1 d . . .
H9 H -0.2577 0.0369 0.0263 0.051 Uiso 1 1 calc R . .
C10 C 0.4857(2) 0.10228(8) 0.67640(18) 0.0408(4) Uani 1 1 d . . .
H10A H 0.5917 0.1267 0.7441 0.061 Uiso 1 1 calc R . .
H10B H 0.5300 0.0617 0.6355 0.061 Uiso 1 1 calc R . .
H10C H 0.3998 0.0897 0.7376 0.061 Uiso 1 1 calc R . .
C11 C 0.5086(2) 0.16537(9) 0.4291(2) 0.0489(4) Uani 1 1 d . . .
H11A H 0.4363 0.1910 0.3381 0.073 Uiso 1 1 calc R . .
H11B H 0.5538 0.1238 0.3929 0.073 Uiso 1 1 calc R . .
H11C H 0.6147 0.1923 0.4880 0.073 Uiso 1 1 calc R . .
H2 H 0.383(2) 0.2280(9) 0.682(2) 0.041(4) Uiso 1 1 d . . .

loop_
_atom_site_aniso_label
_atom_site_aniso_U_11
_atom_site_aniso_U_22
_atom_site_aniso_U_33
_atom_site_aniso_U_23
_atom_site_aniso_U_13
_atom_site_aniso_U_12
N1 0.0398(8) 0.0385(7) 0.0478(8) -0.0121(6) -0.0125(6) 0.0078(6)
N2 0.0329(6) 0.0364(6) 0.0315(6) -0.0066(5) -0.0075(5) 0.0028(5)
N3 0.0285(6) 0.0306(6) 0.0341(6) -0.0023(5) -0.0015(5) 0.0007(4)
N4 0.0319(6) 0.0303(6) 0.0397(7) -0.0040(5) 0.0037(5) -0.0015(5)
N5 0.0342(7) 0.0346(6) 0.0364(6) -0.0039(5) -0.0042(5) -0.0009(5)
N6 0.0394(7) 0.0333(6) 0.0374(7) -0.0038(5) -0.0118(5) 0.0053(5)
N7 0.0533(9) 0.0512(9) 0.0616(9) -0.0209(7) 0.0169(7) -0.0173(7)
C1 0.0334(7) 0.0322(7) 0.0308(7) 0.0000(5) -0.0016(6) 0.0021(6)
C2 0.0266(7) 0.0338(7) 0.0314(7) -0.0034(5) -0.0005(5) -0.0009(5)
C3 0.0308(7) 0.0348(7) 0.0300(7) 0.0006(5) -0.0037(5) 0.0019(6)
C4 0.0305(7) 0.0333(7) 0.0334(7) -0.0018(5) 0.0058(6) -0.0032(6)
C5 0.0300(7) 0.0374(8) 0.0393(8) -0.0053(6) 0.0113(6) -0.0062(6)
C6 0.0330(8) 0.0398(8) 0.0579(10) -0.0054(7) 0.0089(7) -0.0016(6)
C7 0.0473(10) 0.0381(9) 0.0805(13) -0.0113(8) 0.0198(9) -0.0037(7)
C8 0.0508(10) 0.0554(10) 0.0407(9) -0.0102(7) 0.0093(7) -0.0174(8)
C9 0.0434(8) 0.0439(8) 0.0374(8) -0.0022(6) 0.0069(7) -0.0091(7)
C10 0.0316(7) 0.0463(9) 0.0378(8) 0.0017(6) -0.0016(6) 0.0074(6)
C11 0.0453(9) 0.0552(10) 0.0469(9) -0.0026(7) 0.0139(7) -0.0097(8)

_geom_special_details            
; 
 All esds (except the esd in the dihedral angle between two l.s. planes) 
 are estimated using the full covariance matrix.  The cell esds are taken 
 into account individually in the estimation of esds in distances, angles 
 and torsion angles; correlations between esds in cell parameters are only 
 used when they are defined by crystal symmetry.  An approximate (isotropic) 
 treatment of cell esds is used for estimating esds involving l.s. planes. 
;

loop_
_geom_bond_atom_site_label_1
_geom_bond_atom_site_label_2
_geom_bond_distance
_geom_bond_site_symmetry_2
_geom_bond_publ_flag
N1 C1 1.3308(19) . ?
N1 H1A 0.88(2) . ?
N1 H1B 0.89(2) . ?
N2 C1 1.3459(17) . ?
N2 C2 1.4607(18) . ?
N2 H2 0.841(18) . ?
N3 C3 1.3447(17) . ?
N3 N4 1.3669(16) . ?
N3 C2 1.4659(16) . ?
N4 C4 1.3236(18) . ?
N5 C3 1.3270(18) . ?
N5 C4 1.3588(18) . ?
N6 C1 1.3249(17) . ?
N6 C3 1.3544(18) . ?
N7 C8 1.327(2) . ?
N7 C7 1.339(2) . ?
C2 C10 1.5151(19) . ?
C2 C11 1.520(2) . ?
C4 C5 1.4664(19) . ?
C5 C6 1.383(2) . ?
C5 C9 1.388(2) . ?
C6 C7 1.380(2) . ?
C6 H6 0.9300 . ?
C7 H7 0.9300 . ?
C8 C9 1.375(2) . ?
C8 H8 0.9300 . ?
C9 H9 0.9300 . ?
C10 H10A 0.9600 . ?
C10 H10B 0.9600 . ?
C10 H10C 0.9600 . ?
C11 H11A 0.9600 . ?
C11 H11B 0.9600 . ?
C11 H11C 0.9600 . ?

loop_
_geom_angle_atom_site_label_1
_geom_angle_atom_site_label_2
_geom_angle_atom_site_label_3
_geom_angle
_geom_angle_site_symmetry_1
_geom_angle_site_symmetry_3
_geom_angle_publ_flag
C1 N1 H1A 122.7(12) . . ?
C1 N1 H1B 116.5(12) . . ?
H1A N1 H1B 120.7(16) . . ?
C1 N2 C2 123.57(12) . . ?
C1 N2 H2 117.5(11) . . ?
C2 N2 H2 118.5(11) . . ?
C3 N3 N4 110.73(11) . . ?
C3 N3 C2 122.48(12) . . ?
N4 N3 C2 125.76(11) . . ?
C4 N4 N3 101.20(11) . . ?
C3 N5 C4 102.89(11) . . ?
C1 N6 C3 113.86(12) . . ?
C8 N7 C7 116.02(14) . . ?
N6 C1 N1 117.87(13) . . ?
N6 C1 N2 123.45(13) . . ?
N1 C1 N2 118.64(13) . . ?
N2 C2 N3 103.42(11) . . ?
N2 C2 C10 110.05(11) . . ?
N3 C2 C10 110.22(12) . . ?
N2 C2 C11 111.37(13) . . ?
N3 C2 C11 109.58(12) . . ?
C10 C2 C11 111.88(13) . . ?
N5 C3 N3 109.47(12) . . ?
N5 C3 N6 126.38(13) . . ?
N3 C3 N6 124.13(12) . . ?
N4 C4 N5 115.70(12) . . ?
N4 C4 C5 122.97(13) . . ?
N5 C4 C5 121.29(12) . . ?
C6 C5 C9 117.62(14) . . ?
C6 C5 C4 122.67(14) . . ?
C9 C5 C4 119.70(13) . . ?
C7 C6 C5 118.77(16) . . ?
C7 C6 H6 120.6 . . ?
C5 C6 H6 120.6 . . ?
N7 C7 C6 124.20(17) . . ?
N7 C7 H7 117.9 . . ?
C6 C7 H7 117.9 . . ?
N7 C8 C9 124.35(17) . . ?
N7 C8 H8 117.8 . . ?
C9 C8 H8 117.8 . . ?
C8 C9 C5 119.04(16) . . ?
C8 C9 H9 120.5 . . ?
C5 C9 H9 120.5 . . ?
C2 C10 H10A 109.5 . . ?
C2 C10 H10B 109.5 . . ?
H10A C10 H10B 109.5 . . ?
C2 C10 H10C 109.5 . . ?
H10A C10 H10C 109.5 . . ?
H10B C10 H10C 109.5 . . ?
C2 C11 H11A 109.5 . . ?
C2 C11 H11B 109.5 . . ?
H11A C11 H11B 109.5 . . ?
C2 C11 H11C 109.5 . . ?
H11A C11 H11C 109.5 . . ?
H11B C11 H11C 109.5 . . ?

loop_
_geom_hbond_atom_site_label_D
_geom_hbond_atom_site_label_H
_geom_hbond_atom_site_label_A
_geom_hbond_distance_DH
_geom_hbond_distance_HA
_geom_hbond_distance_DA
_geom_hbond_angle_DHA
_geom_hbond_site_symmetry_A
N1 H1A N5 0.88(2) 2.06(2) 2.9444(18) 173.6(17) 4_666
N1 H1B N7 0.89(2) 2.21(2) 3.094(2) 170.3(16) 2_455
N2 H2 N6 0.841(18) 2.128(18) 2.9648(17) 172.9(16) 4_666

_diffrn_measured_fraction_theta_max 0.999
_diffrn_reflns_theta_full        27.50
_diffrn_measured_fraction_theta_full 0.999
_refine_diff_density_max         0.268
_refine_diff_density_min         -0.213
_refine_diff_density_rms         0.042
_exptl_crystal_recrystallization_method 'recrystallized from ethanol'
